# Supplementary material
Source: ML conference proceedings conference paper supplement (https://openreview.net/forum?id=H4lzChGmhCK)

# Difference between the two stopping metrics ( $\epsilon = 0.5, \lambda = 1$ )

German dataset (Solans attack)

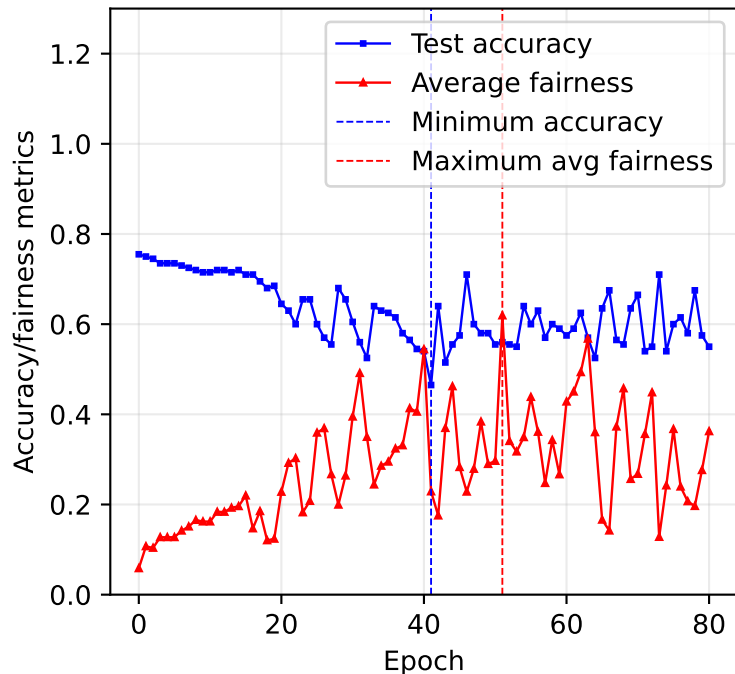

Drug dataset (IAF attack)

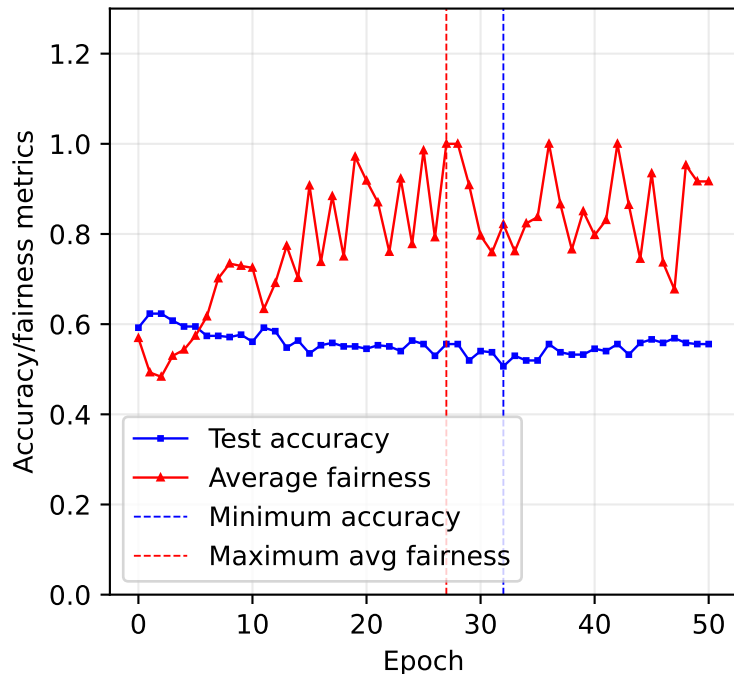

Supplement: supplementary_material [file attachment]
