# Supplementary material
Source: ML conference proceedings conference paper supplement (https://openreview.net/forum?id=H4lzChGmhCK)

# Stopping metric: accuracy

German Dataset

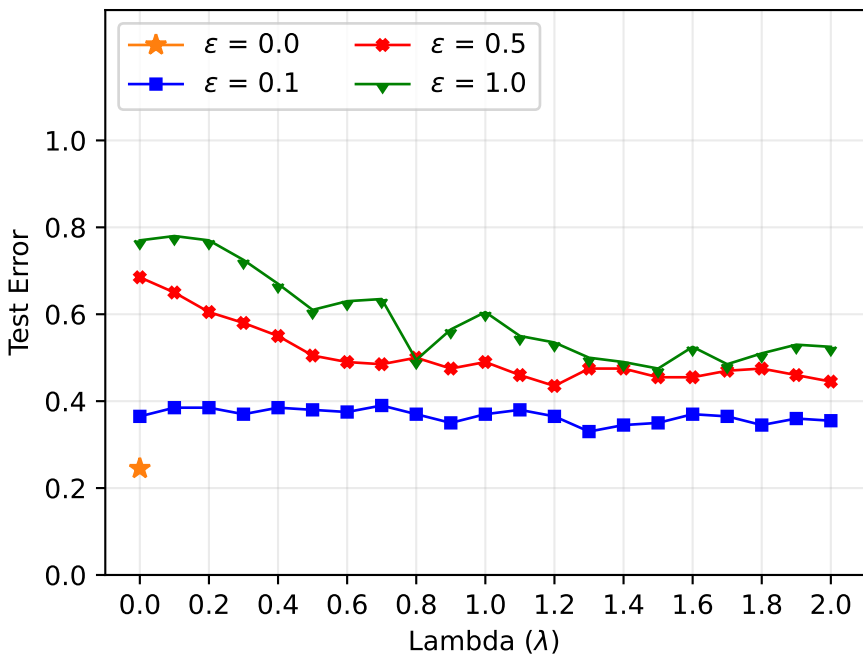

German Dataset

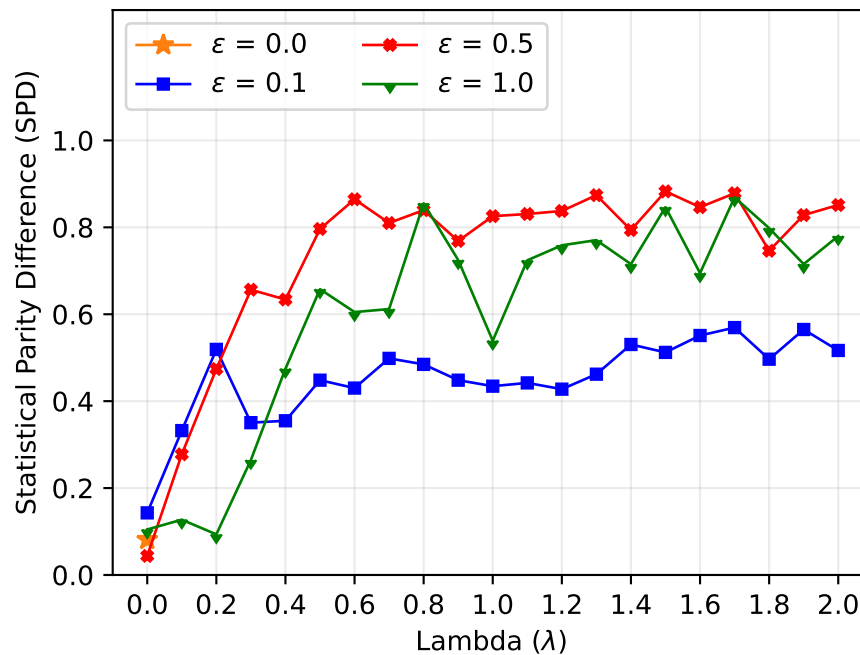

German Dataset

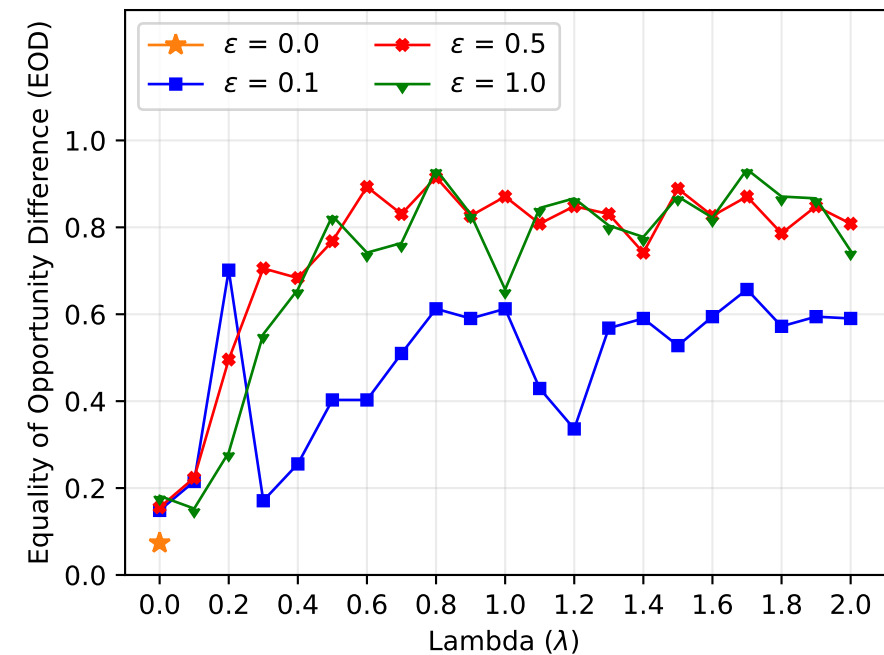

Compas Dataset

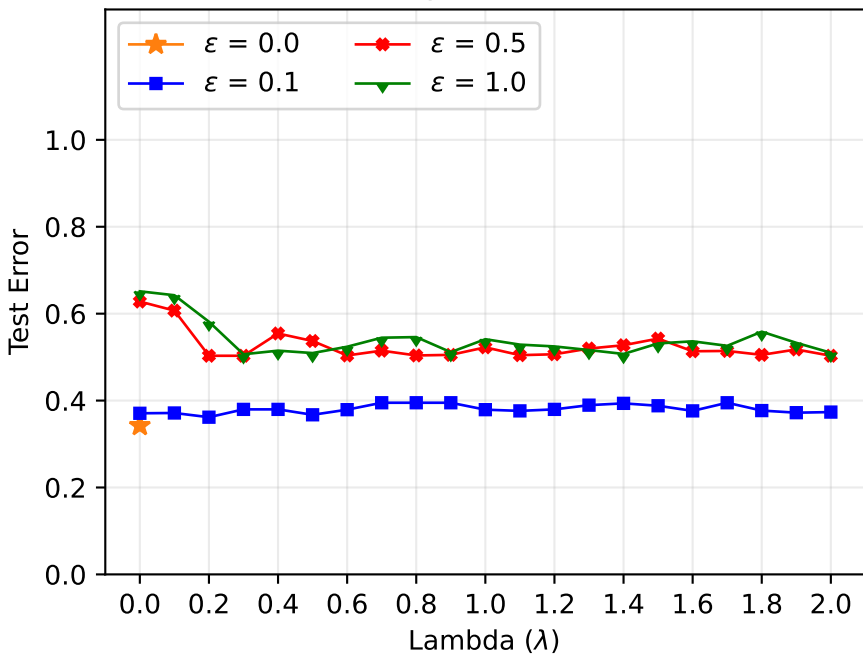

Compas Dataset

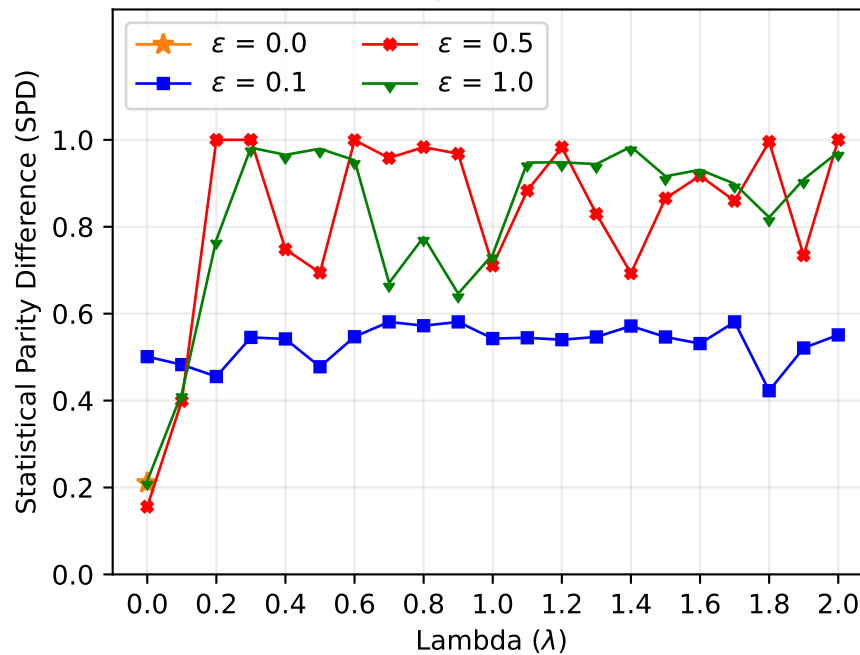

Compas Dataset

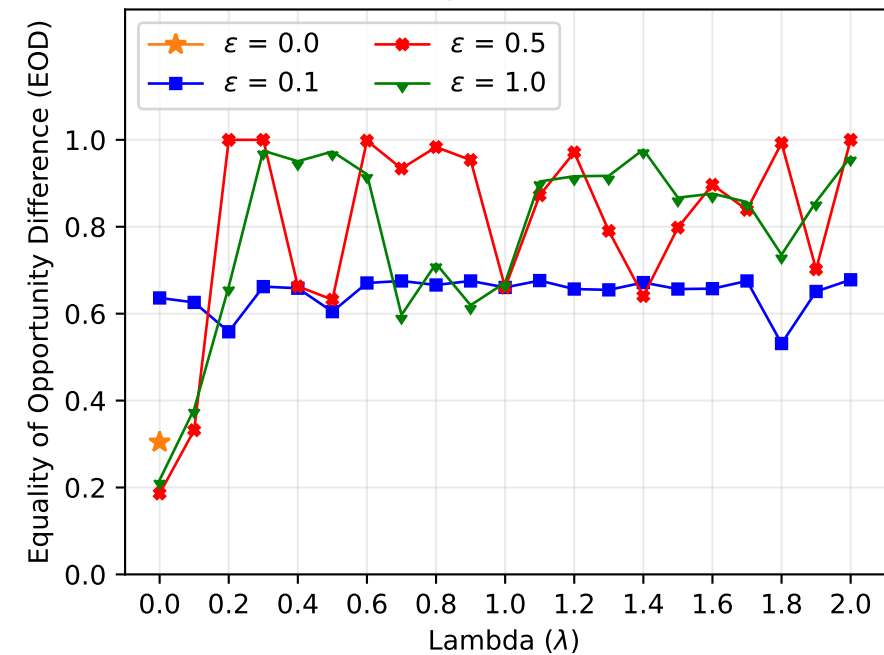

Drug Dataset

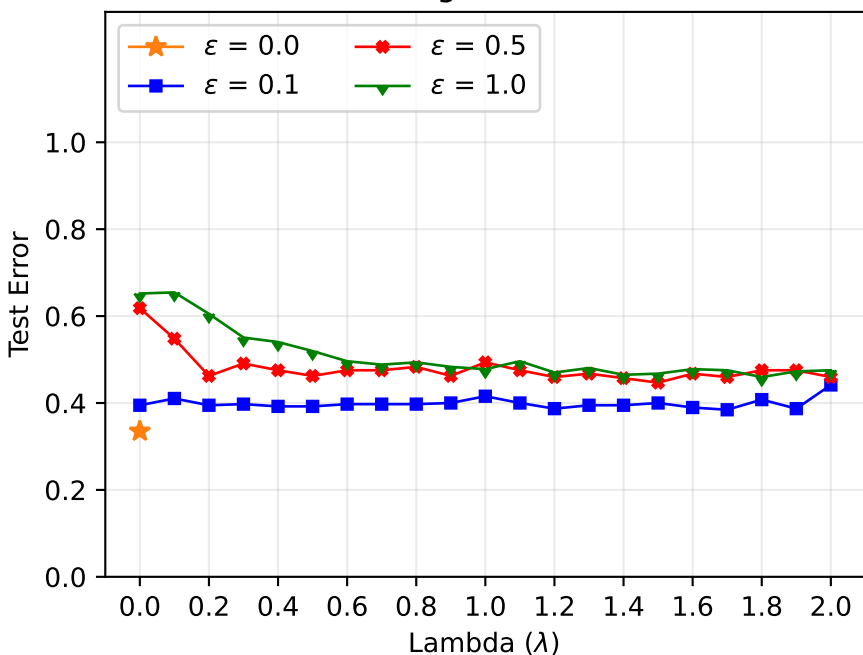

Drug Dataset

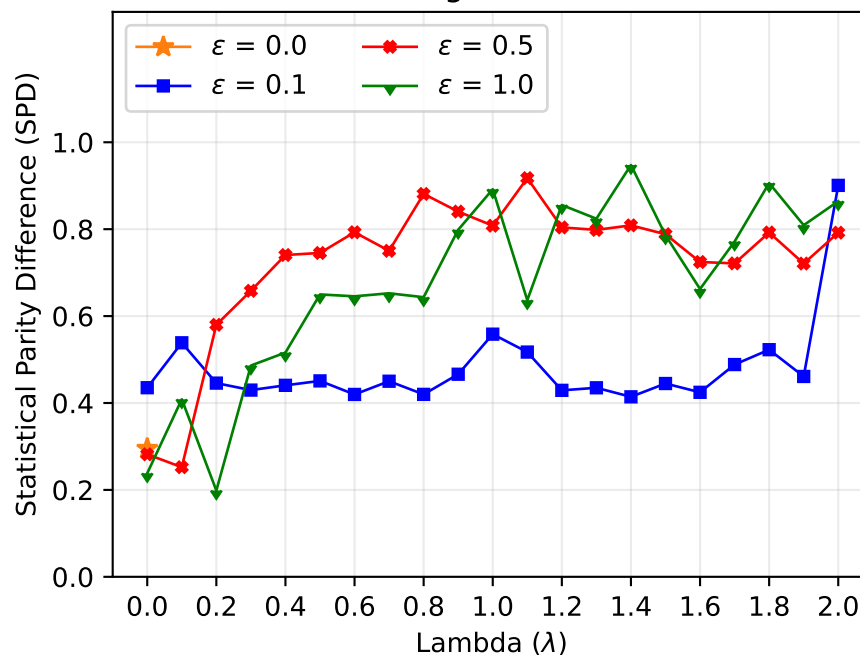

Drug Dataset

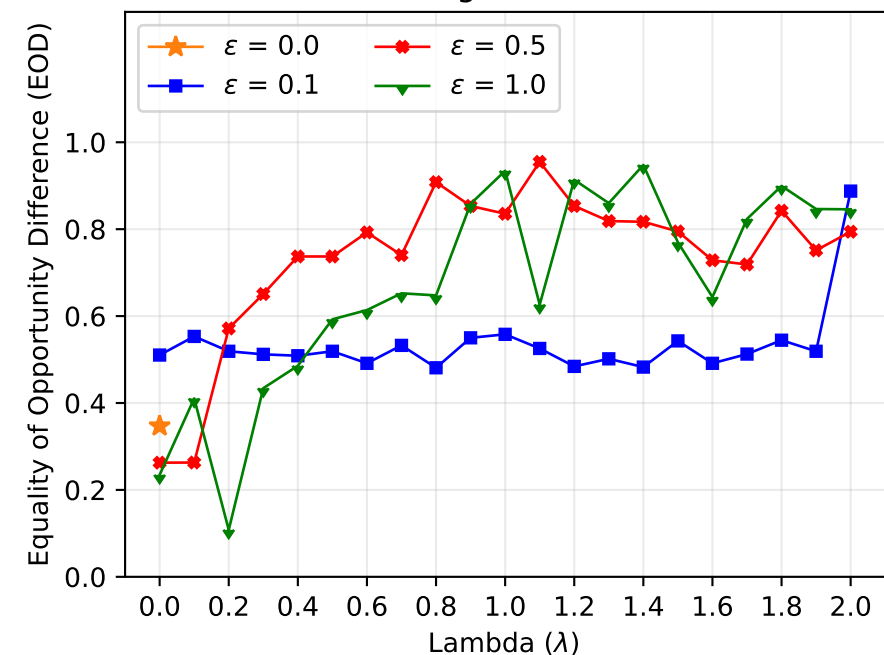

Supplement: supplementary_material [file attachment]
